# Supplementary material for: Infiltration-Friendly Land Uses for Climate Resilience on Volcanic Slopes in the Rejoso Watershed, East Java, Indonesia
Source: Copernicus journal article supplement (doi:10.5194/hess-2020-2), 2020-02-20
Supplement: Supplementary file [file hess-2020-2-AC1-supplement.pdf]

## Supplement Revision note 1.

Table 1. Land use, vegetation, soil conservation measure and slope of measurement plots

| Code                       | Land use                | Vegetation (the average height of trees)                                                                                                                                                                                                             | Terracing                     | Slope at plot level (%) |
|----------------------------|-------------------------|------------------------------------------------------------------------------------------------------------------------------------------------------------------------------------------------------------------------------------------------------|-------------------------------|-------------------------|
| Upstream Rejoso watershed  |                         |                                                                                                                                                                                                                                                      |                               |                         |
| UT1                        | Old production forest   | Pine ( <i>Pinus merkusii</i> ) (34 m) + grass                                                                                                                                                                                                        | None                          | 35-40                   |
| UT2                        | Young production forest | Pine (11 m) + grass                                                                                                                                                                                                                                  | None                          | 50-60                   |
| UT3                        | Agroforestry            | Strip cemara ( <i>Casuarina junghuniana</i> ) (13 m) + Cabbage                                                                                                                                                                                       | None                          | 40-50                   |
| UT4                        | Arable land             | Banana, maize, carrot                                                                                                                                                                                                                                | None                          | 40-50                   |
| Midstream Rejoso watershed |                         |                                                                                                                                                                                                                                                      |                               |                         |
| MT1                        | Old production forest   | Mix Pine (28 m) or mahogany ( <i>Swietenia macrophylla</i> ) (12 m), banana, salak ( <i>Salacca zalacca</i> ), taro ( <i>Colocasia esculenta</i> ), elephant grass ( <i>Miscanthus giganteus</i> ).                                                  | Bench terrace sloping outward | 3-8                     |
| MT2                        | Agroforestry            | Coffee-based (2 m) mix with durian ( <i>Durio zibethinus</i> ) (10 m), mahogany (9 m), <i>Leucaena leucocaphala</i> (8 m), <i>Paraserianthes falcataria</i> (11 m), <i>Albizia saman</i> (11 m), dadap ( <i>Erythrina variegata</i> ) (11 m), banana | Bench terrace sloping outward | 3-8                     |
| MT3                        | Agroforestry            | Clove ( <i>Syzygium aromaticum</i> ) (8 m), banana                                                                                                                                                                                                   | Bench terrace sloping outward | 3-8                     |
| MT4                        | Agroforestry            | Manggo ( <i>Mangifera indica</i> ) (10 m), durian (10 m), <i>Randu kapuk</i> ( <i>Ceiba pentandra</i> ) (11 m), maize, cassava, groundnut                                                                                                            | Bench terrace sloping outward | 3-8                     |

**Supplement Revision Note 2:**

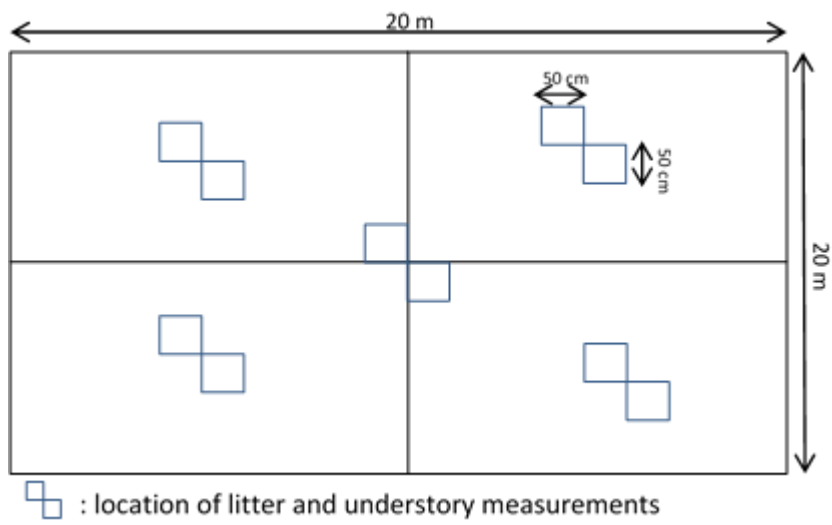

Figure 1. The Scheme to measure the undergrowth or litter mass.

**Supplement Revision Note 3:** The additional data to revise Table 2.

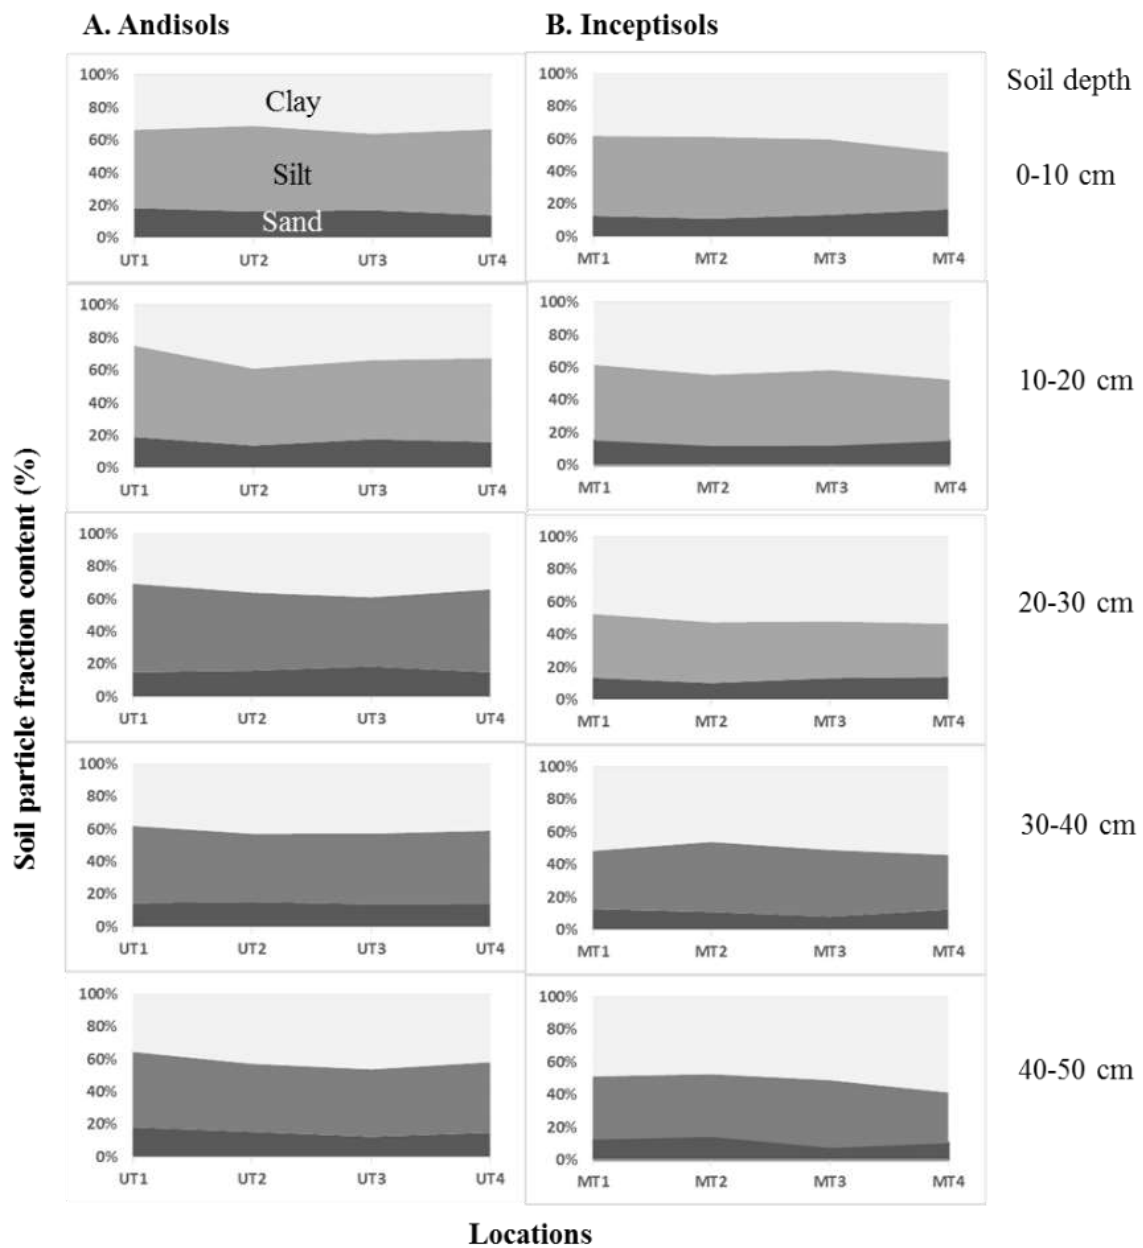

**Figure: 2.** Soil texture in five different layers in runoff plot measurements

Table 2. bulk density, particle density, soil porosity, macro-porosity and organic C of runoff plots

a. Upstream Rejoso watershed: Andisols

| Location code | Bulk Density (g cm <sup>-3</sup> )* |       |       | Particle Density (g cm <sup>-3</sup> )* |       |       | Soil porosity (%)* |       |       | Soil Macro-porosity (%) |       |       | C <sub>org</sub> (%)* |        |       |
|---------------|-------------------------------------|-------|-------|-----------------------------------------|-------|-------|--------------------|-------|-------|-------------------------|-------|-------|-----------------------|--------|-------|
|               | At soil depth (cm)                  |       |       |                                         |       |       |                    |       |       |                         |       |       |                       |        |       |
|               | 0-10                                | 10-20 | 20-30 | 0-10                                    | 10-20 | 20-30 | 0-10               | 10-20 | 20-30 | 0-10                    | 10-20 | 20-30 | 0-10                  | 10-20  | 20-30 |
| UT1           | 0.87a                               | 0.81a | 0.83a | 2.16a                                   | 2.23a | 2.31a | 60a                | 63a   | 64c   | 8.0b                    | 5.2b  | 0.9a  | 2.05bc                | 1.61c  | 1.79b |
| UT2           | 0.85a                               | 0.86a | 0.82a | 2.27a                                   | 2.30a | 2.33a | 63a                | 63a   | 65c   | 5.1ab                   | 1.5a  | 0.3a  | 2.46c                 | 1.56bc | 1.78b |
| UT3           | 0.81a                               | 0.84a | 0.85a | 2.14a                                   | 2.12a | 2.28a | 62a                | 60a   | 63b   | 4.7ab                   | 2.1ab | 1.4a  | 1.17a                 | 0.58a  | 0.71a |
| UT4           | 0.84a                               | 0.88a | 0.84a | 2.28a                                   | 2.29a | 2.08a | 63a                | 62a   | 60a   | 3.0a                    | 0.3a  | 0.1a  | 1.35ab                | 1.06ab | 0.92a |
| LSD           | 0.07                                | 0.13  | 0.12  | 0.17                                    | 0.21  | 0.38  | 4                  | 5     | 1     | 3.52                    | 3.4   | 1.8   | 0.85                  | 0.50   | 0.50  |

b. Midstream Rejoso watershed: Inceptisols

| Location code | Bulk Density (g cm <sup>-3</sup> )* |       |        | Particle Density (g cm <sup>-3</sup> )* |       |       | Soil porosity (%)* |       |       | Soil Macro-porosity (%) |       |       | C <sub>org</sub> (%)* |       |       |
|---------------|-------------------------------------|-------|--------|-----------------------------------------|-------|-------|--------------------|-------|-------|-------------------------|-------|-------|-----------------------|-------|-------|
|               | At soil depth (cm)                  |       |        |                                         |       |       |                    |       |       |                         |       |       |                       |       |       |
|               | 0-10                                | 10-20 | 20-30  | 0-10                                    | 10-20 | 20-30 | 0-10               | 10-20 | 20-30 | 0-10                    | 10-20 | 20-30 | 0-10                  | 10-20 | 20-30 |
| MT1           | 0.83a                               | 0.85a | 0.83a  | 2.20a                                   | 2.28a | 2.20a | 62c                | 63a   | 62b   | 13.6a                   | 7.0bc | 2.5c  | 1.73a                 | 1.87a | 1.65b |
| MT2           | 0.96b                               | 0.91a | 0.91a  | 2.42b                                   | 2.38a | 2.21a | 60bc               | 62a   | 59ab  | 16.1b                   | 8.3c  | 1.8bc | 2.22a                 | 1.59a | 1.84b |
| MT3           | 1.03bc                              | 0.96a | 0.94ab | 2.38b                                   | 2.36a | 2.40a | 57ab               | 59a   | 61b   | 11.7a                   | 3.4ab | 0.9ab | 2.19a                 | 1.61a | 1.01a |
| MT4           | 1.09c                               | 1.04a | 1.04b  | 2.38b                                   | 2.33a | 2.33a | 54a                | 55a   | 55a   | 11.4a                   | 0.8a  | 0 a   | 1.71a                 | 1.36a | 1.12a |
| LSD           | 0.10                                | 0.24  | 0.11   | 0.15                                    | 0.17  | 0.22  | 4                  | 10    | 4     | 4.0                     | 3.9   | 1.0   | 0.84                  | 0.54  | 0.41  |

\*The same letter indicates no statistically significant differences between location with Fisher's LSD test ( $p < 0.05$ ).

Note: soil macro porosity measured using metylene blue method, will be describe in the Material and Method

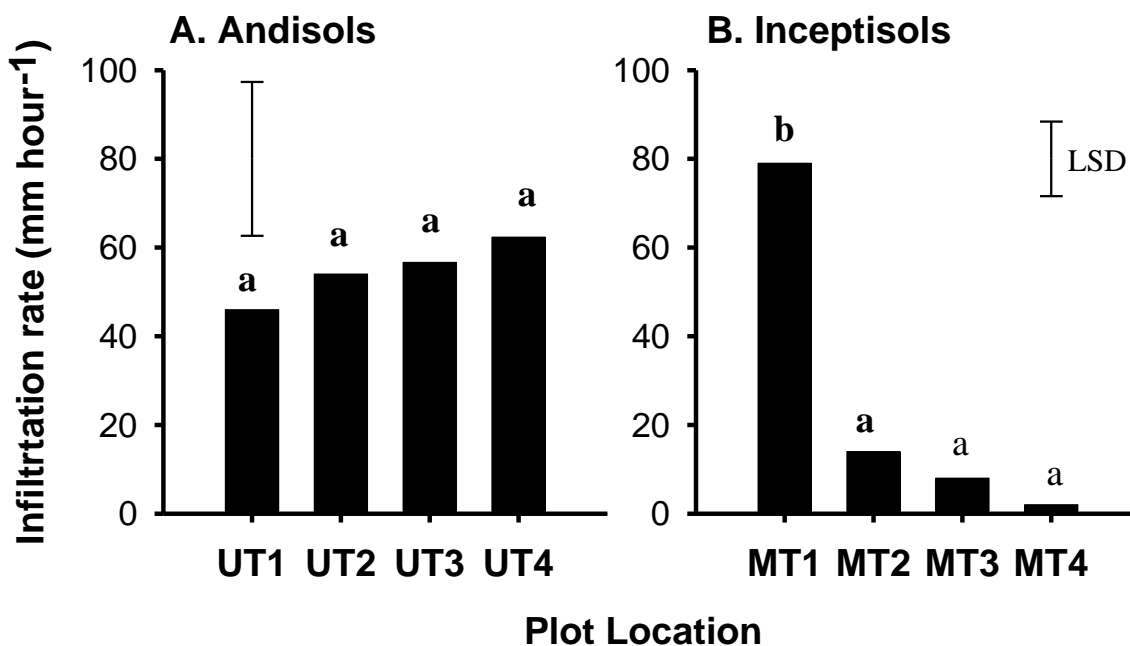

Figure 3. Soil Infiltration rate measured using double ring infiltrometer (n=6)

## Supplement Revision Note 4.

# References

- Aduah M.S., Jewitt G.P.W., Toucher M.L.W. Scenario-based impacts of land use and climate changes on the hydrology of a lowland rainforest catchment in Ghana, West Africa. *Hydrology and Earth System Sciences*, Discuss., <https://doi.org/10.5194/hess-2017-591>. 2017
- Ali M., Hadi S., and Sulistyantara B. Study on land cover change of Ciliwung downstream watershed with spatial dynamic approach. CITIES 2015 International Conference, Intelligent Planning Towards Smart Cities, CITIES 2015, 3-4 November 2015, Surabaya, Indonesia. *Procedia - Social and Behavioral Sciences* 227: 52 – 59. 2016
- Arumsari, I. 2003. The effect of canopy covering in horticultural plants toward the rate of surface runoff and erosion in sarongge's sand andisols, Cipanas. Skripsi. Bogor Agriculture Institute (IPB). [Indonesia] <http://repository.ipb.ac.id/handle/123456789/19028> 2013.
- Blake, G.R., Hartge, K.H. Bulk density. In: Klute, A.K. (Ed.), *Methods of soil analysis. Part I: Physical and mineralogical methods. American Society of Agronomy – Soil Science Society of America*, Madison, pp. 363–375. 1986
- Carlesso, R., Spohr, R.B., Eltz, F.L.F., Flores, C.H. Runoff estimation in southern Brazil based on Smith's modified model and the Curve Number method. *Agricultural Water Management*. 98, 1020–1026.2011.
- Creed IF, van Noordwijk M. Forest and water on a changing planet: Vulnerability, adaptation and governance opportunities. A Global Assessment Report. World Series Volume 38. Vienna. Austria: IUFRO. 2018
- Derpsch, R., Franzluebbers, A.J., Duiker, S.W., Reicosky, D.C., Koeller, K., Friedrich, T., Sturny, W.G., Sá, J.C.M., Weiss, K. Why do we need to standardize no-tillage research?. *Soil and Tillage Research* 137, 16–22. 2014.
- de Almeida W.S., Elói Panachuki E., de Oliveira P.T.S., da Silva Menezes R., Sobrinho T.A. , de Carvalho, D.F. Effect of soil tillage and vegetal cover on soil water infiltration. *Soil and Tillage Research* 175: 130–138 <http://dx.doi.org/10.1016/j.still.2017.07.009>. 2018.
- Ellison, D., Morris, C.E., Locatelli, B., Sheil, D., Cohen, J., Murdiyarto, D., Gutierrez, V., van Noordwijk, M., Creed, I.F., Pokorny, J. Trees, forests and water: cool insights for a hot world. *Global Environmental Change* 43:51–61. 2017
- Ellison, D., Wang-Erlandsson, L., van der Ent, R.J. and van Noordwijk, M. Upwind forests: managing moisture recycling for nature-based resilience. *Unasylva*, 251, 13-26. 2019
- Gee, G.W. and J.W. Bauder. Particle Size Analysis. In: *Methods of Soil Analysis, Part A*. Klute (ed.). 2 Ed., Vol. 9 nd . *American Society of Agronomy*, Madison, WI, pp: 383-411. 1986
- Government of Indonesia. Law (Undang-undang) Number 41 Year 1999 about Forestry. [Indonesia]. 1999.
- Government of Indonesia. Law (Undang-undang) Number 26 Year 2007 about Spatial Planing. [Indonesia]. 2007

- Hairiah K, Suprayogo D, Widiyanto, Berlian, Suhara E, Mardiasuning A, Widodo RH, Prayogo C, Rahayu S. Forests conversion into agricultural land: litter thickness, earthworm populations and soil macro-porosity. *Agrivita* 26 (1), 68–80. [Indonesia]. 2004.
- Hairiah K, Sulistyani H, Suprayogo D, Widiyanto, Purnomosidhi P, Widodo R H, and Van Noordwijk M. Litter layer residence time in forest and coffee agroforestry systems in Sumberjaya, West Lampung. *Forest Ecology and Management* 224: 45-57. 2006.
- Hairiah K, Ekadinata A, Sari RR, Rahayu S. Measurement of Carbon Stock: from land level to landscape. Practical instructions. Second edition. Bogor, World Agroforestry Centre, ICRAF SEA Regional Office, University of Brawijaya (UB), Malang, Indonesia 110 p.[Indonesia] <http://apps.worldagroforestry.org/sea/Publications/files/manual/MN0049-11.pdf>. 2011
- Hoechstetter, S., Walz, U., Dang, L. H., Thinh, N. X.. Effect of Topography and Surface Roughness in Analyses of Landscape Structure- A Proposal Modify The Existing Set of Landscape Metrics. *Landscape Online* 3: 1-14 (8). [https://gfzpublic.gfz-potsdam.de/pubman/item/item\\_32854](https://gfzpublic.gfz-potsdam.de/pubman/item/item_32854). 2008
- Jacobs S.R, Timbe E., Weeser B., Rufino M.C., Butterbach-Bahl K., and Breuer L. Assessment of hydrological pathways in East African montane catchments under different land use. *Hydrology and Earth System Sciences*, 22, 4981–5000, <https://doi.org/10.5194/hess-22-4981-2018>
- Jennings, S.B., N.D. Brown, and D. Sheil.. Assessing forest canopies and understorey illumination: Canopy closure, canopy cover and other measures. *Forestry*72(1):59-73. 1999.
- Jones JA, Wei X, Archer E, Bishop K, Blanco JA, Ellison D, Gush M, McNulty SG, van Noordwijk M, Creed IF. Forest-Water Interactions Under Global Change. pp. 589-624 in: D.F.Levia et al. (Eds) Forest-Water Interactions. Ecological Studies 240. Springer Nature, Switzerland. [https://doi.org/10.1007/978-3-030-26086-6\\_24](https://doi.org/10.1007/978-3-030-26086-6_24). 2020.
- Li X, Niu J, Xie B. The Effect of Leaf Litter Cover on Surface Runoff and Soil Erosion in Northern China. *PLoS ONE* 9(9): e107789. doi:10.1371/journal.pone.0107789. 2014
- Liu Y., Zeng Cui, Z., Huang Z., Hai-Tao Miao, H.T. and Wu, G.L. The influence of litter crusts on soil properties and hydrological processes in a sandy ecosystem. *Hydrology and Earth System Sciences*, 23, 2481–2490. <https://doi.org/10.5194/hess-23-2481-2019>. 2019.
- Ostovar, A.L. Investing upstream: Watershed protection in Piura, Peru. Volume 96, Pages 9-17 <https://doi.org/10.1016/j.envsci.2019.02.005>. 2019.
- Peña-Arancibia, J.L., Bruijnzeel, L.A., Mulligan, M. and van Dijk, A.I. Forests as ‘sponges’ and ‘pumps’: Assessing the impact of deforestation on dry-season flows across the tropics. *Journal of Hydrology*, 574, pp.946-963. 2019
- Nimmo, J.R. Porosity and pore size distribution. In: Hillel, D. (Ed.), *Encyclopedia of Soils in the Environment*. Elsevier, London, pp. 295–303. 2004.
- Rodenburg, J., Stein, A., van Noordwijk, M. and Ketterings, Q.M. Spatial variability of soil pH and phosphorus in relation to soil run-off following slash-and-burn land clearing in Sumatra, Indonesia. *Soil and Tillage Research*, 71(1), pp.1-14. 2003.
- Sajikumar N. and Remya R.S. Impact of land cover and land use change on runoff characteristics. *Journal of Environmental Management* 161: 460-468. <http://dx.doi.org/10.1016/j.jenvman.2014.12.041>. 2015.

- Shannon P.D., Swanston C.W., Janowiak M.K., Handler S.D., Schmitt K.M., Brandt L.A., Butler-Leopold P.R., Ontl T. Adaptation strategies and approaches for forested watersheds. Review article. *Climate Services* 13: 51–64. <https://doi.org/10.1016/j.cliser.2019.01.005>. 2019.
- Suprayogo D., Widiyanto, K Hairiah, I Nita. Watershed management: hydrological consequences of land use change during development. Universitas Brawijaya Press. [Indonesia]. 2017.
- Tanika L, Khasanah N, Leimona B. Simulasi dampak perubahan tutupan lahan terhadap neraca air di DAS dan Sub-DAS Rejoso menggunakan model GenRiver. Report. Bogor, Indonesia: World Agroforestry Centre (ICRAF) Southeast Asia Regional Program. 2018
- UN-Water. Sustainable Development Goal 6 Synthesis Report on Water and Sanitation. <http://www.unwater.org/publications/highlights-sdg-6-synthesis-report-2018-on-water-and-sanitation-2/>. 2018.
- U.S. Geological Survey (USGS). Landsat 8 OLI (2019-10-18 (6,53)). <https://earthexplorer.usgs.gov/> 2019.
- Walkley, A., Black, I.A. An examination of the Degtjareff method for determining soil organic matter, and a proposed modification of the chromic acid titration method. *Soil Science* 37, 29–38. 1934.
- van Noordwijk, M., Bayala, J., Hairiah, K., Lusiana, B., Muthuri, C., Khasanah, N., & Mulia, R. Agroforestry solutions for buffering climate variability and adapting to change. In: Fuhrer, J., & Gregory, P. J. (Eds.) *Climate change Impact and Adaptation in Agricultural Systems*. Wallingford, UK: CAB-International, 216-232. 2014.
- van Noordwijk M., Tanika L., Betha Lusiana B. Flood risk reduction and flow buffering as ecosystem services –Part 2: Land use and rainfall intensity effects in Southeast Asia. *Hydrology and Earth System Sciences*, 21, 2341–2360, <http://doi:10.5194/hess-21-2341-2017>. 2017.
- van Noordwijk M, Barges-Tobella A, Muthuri CW, Gebrekirstos A, Maimbo M, Leimona B, Bayala J, Ma X, Lasco R, Xu J, Ong CK. Agroforestry as part of nature-based water management. pp 261-287 In: van Noordwijk M (Ed.) *Sustainable Development Through Trees on Farms: Agroforestry in its Fifth Decade*. World Agroforestry (ICRAF), Bogor, Indonesia. 2019
- Wiersum, K.F. Surface erosion under various agroforestry systems. In: *Proc. Symp. Effects of forest land use on erosion and slope stability*. Environment & Policy Institute East-West Center, Honolulu, pp. 231-239. 1984
- Zhang, J., van Meerveld, H.I., Tripoli, R. and Bruijnzeel, L.A. Runoff response and sediment yield of a landslide-affected fire-climax grassland micro-catchment (Leyte, the Philippines) before and after passage of typhoon Haiyan. *Journal of hydrology*, 565, 524-537. 2018.
- Zhang, J., Bruijnzeel, L.A., Quiñones, C.M., Tripoli, R., Asio, V.B. and van Meerveld, H.J. Soil physical characteristics of a degraded tropical grassland and a ‘reforest’: Implications for runoff generation. *Geoderma*, 333, 163-177. 2019.
- Zhao Y., Wang Y., Wang L., Zhang X., Yu Y., Zhao J., Lin H., Chen Y., Zhou W., An Z. Exploring the role of land restoration in the spatial patterns of deep soil water at watershed scales. *Catena* 172: 387–396. <https://doi.org/10.1016/j.catena.2018.09.004>. 2019.
- Zhipeng L., Donghao M., Wei H., Xuelin L. Land use dependent variation of soil water infiltration characteristics and their scale-specific controls. *Soil and Tillage Research*.178: 139–149. <https://doi.org/10.1016/j.still.2018.01.001>. 2018.

Zwartendijk, B.W., Van Meerveld, H.J., Ghimire, C.P., Bruijnzeel, L.A., Ravelona, M. and Jones, J.P.G. Rebuilding soil hydrological functioning after swidden agriculture in eastern Madagascar. *Agriculture, ecosystems & environment*, 239, pp.101-111. 2017.



## Supplement Revision Note 5.

The Rejoso watershed, is located in the foothills of Mount Bromo, covering 16 sub-districts in Pasuran District, East Java Province, Indonesia. The Rejoso watershed is located between 7°37'13.35" - 7°55'18.63" South, and between 112°48'32.51" to 113°55'55" East (Figure 1). The Rejoso watershed covers an area of 63,359 hectares with a watershed length of about 22 km. This study was conducted in two locations, namely in the upstream (above 800 m a.s.l.) and midstream (400-800 m a.s.l.) sections, with the dominant vegetation (land cover) selected for each location (Figure 1). In each location four dominant land use systems were assessed (Table 1), spatially replicated in three separate measurement plots.

Climatic conditions that influence hydrology and erosion are largely determined by influence of the northwest and southwest monsoons. The northwest monsoon, picking up large amounts of moisture over the Indian Ocean, brings in most of the annual precipitation in the area, and predominates during the period from November through April. Although there is considerable variation in the amount and distribution of rainfall from year to year, most places in the watershed receive about four-fifth of the rainfall during the November-April wet season. Due to topographic influences, there is considerable spatial variation in annual precipitation as well, but generally ranges from 1500 mm to 3000 mm. The May to October period is considered the dry season. Then the southeast monsoon predominates, bringing much smaller amounts of precipitation due to the lower atmospheric moisture caused by lower temperatures in the Southern hemisphere at this time of the year. The rainfall distribution in upper-stream and Mid-stream is indicated that.....

**Will be presenting graph monthly rainfall distribution from the average 10 years rain evens in Upper-stream and Mid-stream.**

The Rejoso watershed watersheds consist of four types of soil, namely: Andisols, Inceptisols, Alfisols, and Entisols. Andisols are mainly distributed in the upperland, on the upper slopes of volcanoes. Andisols have a distinct black to very dark brown surface horizon within organic matter, which usually overlies a brown to dark yellowish brown subsoil. The clay fraction is dominated by allophane compounds. Andisols are highly permeable, porous with low bulk density, a high water-holding capacity and a crumb structure. The most common texture is sandy loam. Both soils have high inherent fertility and are highly erodible only when seriously distributed. The middle and some lower volcanic slopes, consisting of easily weatherable permeable tuffs and ashes, give rise to deep stable soils – Inceptisols and Alfisols. Inceptisols are soils with only a limited horizon differentiation. Their texture ranges from deep friable clays to clay loams. Alfisols are soils which have accumulation of clay in the subsoil. Their texture ranges from loam to clay loam in the topsoil and clay loam to clay in the subsoil. Both soils have moderate to high inherent fertility but are highly susceptible to erosion. The Entisols are soils that lack horizon development and are found on volcanic sands, ashes and tuffs. Entisols occur on recent and sub-recent lahars of **the Bromo** volcanoes. Entisols with a coarse texture are extremely erodible and have very low water holding capacities. Permanent vegetative cover and especially diversified tree crops and agroforestry or forestry are most suitable land utilisation types to prevent erosion.

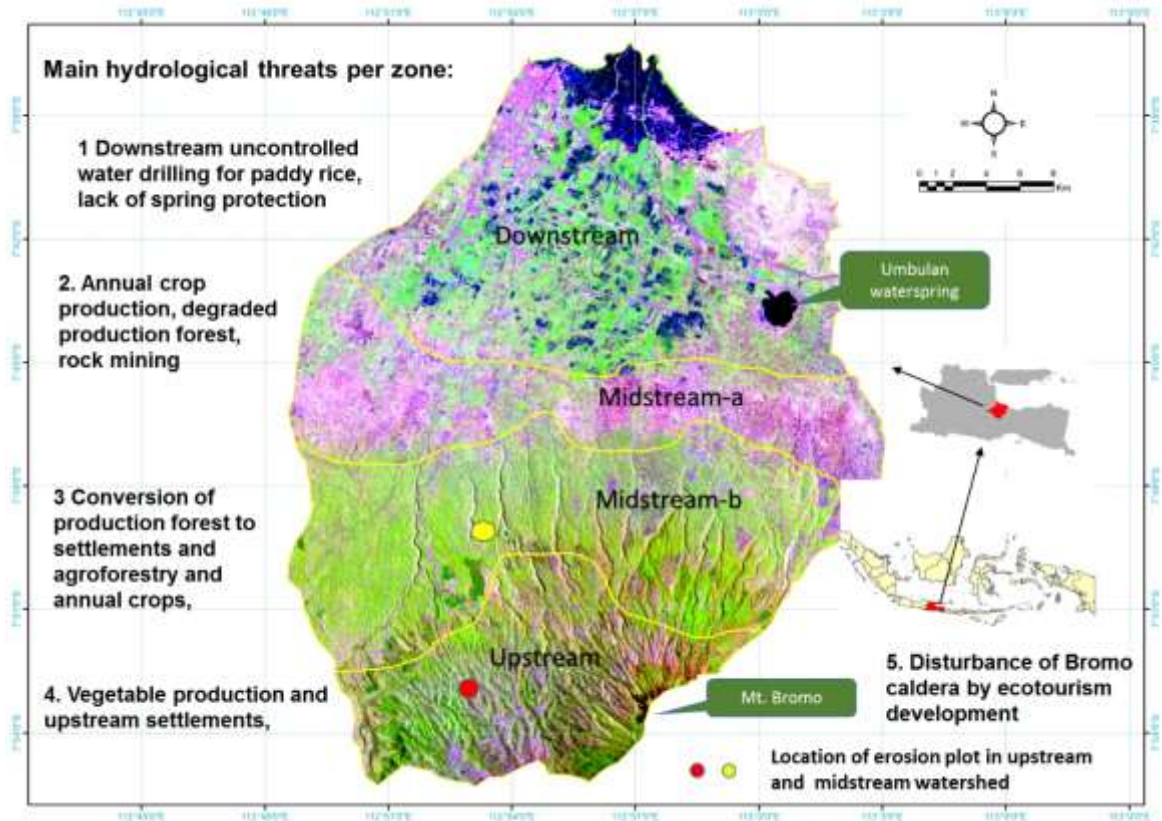

Figure 4. The Rejoso Watershed from upstream (at the bottom) to sea level and land uses considered to be a hydrological threat; purple indicates open soil, green tree cover. (Modified from USGS, 2019).

### Supplement Revision Note 6

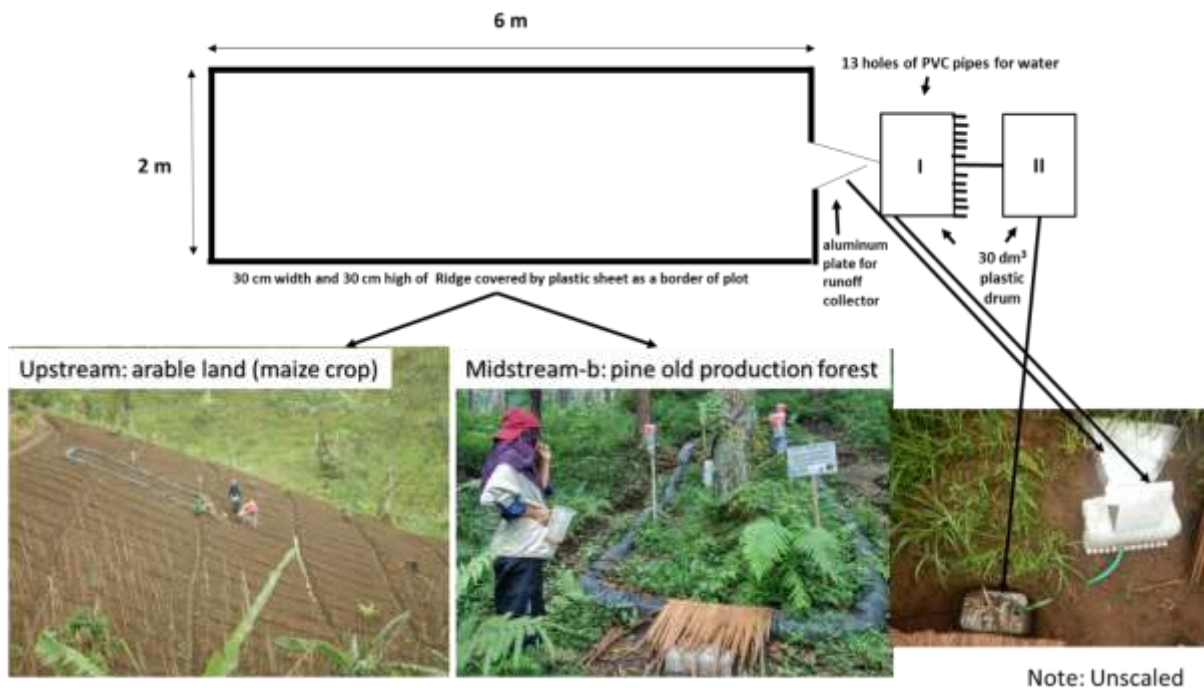

Figure 5. Runoff and soil erosion plot measurements in Rejoso Watershed.).

**Supplement Revision Note 7.**

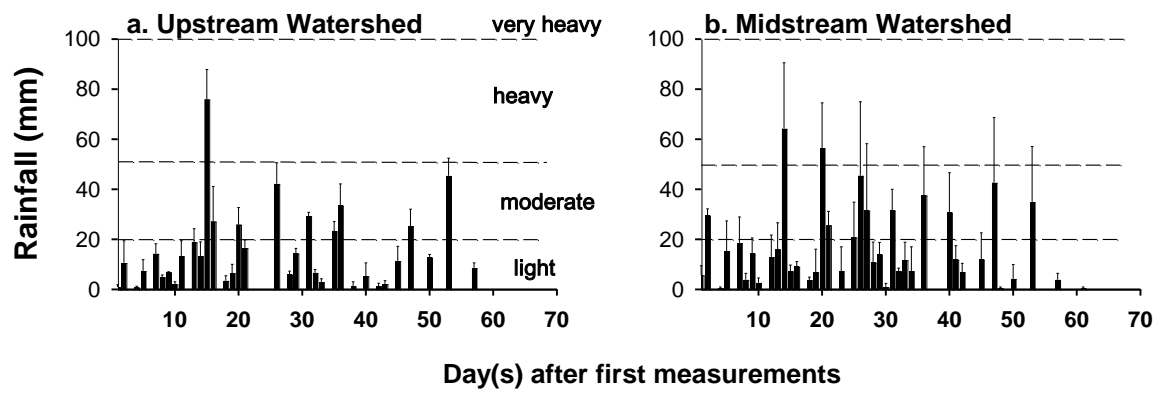

Figure 6. Distribution of rainfall during observation start on March 03, 2017 in the Rejoso watershed.
